# Supplementary material for: Imperfect Vaccine Aggravates the Long-Standing Dilemma of Voluntary Vaccination
Source: PLOS journal article supplement (doi:10.1371/journal.pone.0020577), 2011-06-08
Supplement: S1 (10.1371/journal.pone.0020577.s001) [file journal.pone.0020577.s001]

# Text Supplementary 1 - Imperfect vaccine aggravates the long-standing dilemma of voluntary vaccination

Bin Wu<sup>1\*</sup>, Feng Fu<sup>2</sup>, Long Wang<sup>1</sup>

**1** Center for Systems and Control, State Key Laboratory for Turbulence and Complex Systems, College of Engineering, Peking University, Beijing, China

**2** Program for Evolutionary Dynamics, Harvard University, Cambridge, Massachusetts, USA

\* E-mail: bin.wu@evolbio.mpg.de

## Dynamics analysis

In the following, we show the dynamics analysis for

$$\dot{x} = x(1-x)(ef(ex)C - V) \quad (1)$$

where the function of infection risk is given by

$$f(x) = \begin{cases} 1 - \frac{1}{R_0(1-x)} & \text{if } 0 \leq x < 1 - \frac{1}{R_0} \\ 0 & x \geq 1 - \frac{1}{R_0} \end{cases} \quad (2)$$

Let  $G(x) = ef(ex) - r$ , where  $r = V/C$ . The above replicator equation is equivalent to

$$\dot{x} = x(1-x)G(x) \quad (3)$$

under a time rescaling [1].

**Theorem** For the evolutionary outcome depicted by the replicator equation, we have

(i) When  $R_0 \leq \frac{1}{1-r}$ ; all are unvaccinated.

(ii) When  $\frac{1}{1-r} < R_0 \leq (\frac{1}{1-\sqrt{r}})^2$ ; if  $e \leq \frac{r}{1-\frac{1}{R_0}}$ , all are unvaccinated, otherwise there is a unique internal stable equilibrium  $x^*$ .

(iii) When  $R_0 > (\frac{1}{1-\sqrt{r}})^2$ ; if  $e \leq \frac{r}{1-\frac{1}{R_0}}$ , all are unvaccinated, if  $\frac{r}{1-\frac{1}{R_0}} < e \leq e_1^*$ , there is a unique internal stable equilibrium  $x^*$ , if  $e_1^* < e \leq e_2^*$ , full vaccination, if  $e_2^* < e$ , there is a unique internal stable equilibrium  $x^*$ .

Where  $x^* = \frac{1 - \frac{1}{R_0(1-\frac{r}{e})}}{e}$ ,  $e_{1,2}^* = \frac{1+r}{2} - \frac{1}{2R_0} \pm \frac{\sqrt{R_0^2(1-r)^2 - 2R_0(1+r)+1}}{2R_0}$ .

*proof*

For (i):

since  $f(y)$  is decreasing, thus  $G(x)$  is decreasing. Therefore if  $G(0) < 0$ , then  $G(x) < 0$  for all the  $x$  between 0 and 1. This induces  $x^* = 0$  is the unique stable equilibrium for the dynamical system.

But  $G(0) = ef(0) - r$ . If  $R_0 \leq \frac{1}{1-r}$  is valid, then  $G(0) = e(1 - \frac{1}{R_0}) - r < 0$  is valid for any  $e$  between 0 and 1. This completes the proof for (i).

For (ii):

for  $R_0 \leq (\frac{1}{1-\sqrt{r}})^2$ , we have that  $G(1)$  is smaller than zero for any  $e$ . For  $R_0 > \frac{1}{1-r}$ , the sign of  $G(0)$  depends on  $e$ : if  $e \leq \frac{r}{1-\frac{1}{R_0}}$ , it is negative, which results in all unvaccination eventually. Otherwise, it is positive. In this case, there is a unique equilibrium  $x^*$  lying between 0 and 1 since  $G(x)$  is continuous and monotonic [2]. In addition to this, the derivative of  $G(x)$  at  $x^*$  is negative since  $f(x)$  is decreasing. Therefore, there is a unique internal stable equilibrium  $x^*$ . By the  $f(x)$  we adopt, we have  $x^* = \frac{1 - \frac{1}{R_0(1-\frac{r}{e})}}{e}$ .

This completes the proof of (ii).

For (iii):

if  $e \leq \frac{r}{1-\frac{1}{R_0}}$ , we have  $G(0) < 0$ . In analogy to the proof in (i), we have  $x^* = 0$  is the unique stable equilibrium.

If  $\frac{r}{1-\frac{1}{R_0}} < e \leq e_1^*$ , then  $G(0) > 0$  while  $G(1) < 0$ . In analogy to (ii), there is a unique internal stable equilibrium  $x^*$ ;

If  $e_1^* < e \leq e_2^*$ , we have  $G(1) > 0$ , since  $G(x)$  is decreasing, we have  $G(x)$  is positive for all the  $x$  lying between zero and one. Thus, all vaccination becomes the unique stable equilibrium this time.

If  $e_2^* < e$ , then  $G(0) > 0$  while  $G(1) < 0$ , In analogy to (ii), there is a unique internal stable equilibrium  $x^*$ .

This completes the proof.

## References

1. Hofbauer J, Sigmund K (1998) Evolutionary Games and Population Dynamics. Cambridge: Cambridge University Press.
2. Rudin W (1986) Principles of mathematical analysis. McGraw-Hill.
